# Supplementary material for: One-dimensional hierarchical composite materials based on ZnO nanowires and electrospun blend nanofibers
Source: Royal Society of Chemistry journal article supplement (doi:10.1039/c3ra43672a), 2013-01-01
Supplement: c3ra43672a.pdf [file c3ra43672a.pdf]

## ELECTRONIC SUPPORTING INFORMATION

### One-dimensional hierarchical composite materials based on ZnO nanowires and blend nanofibers

Thushara J. Athauda<sup>1</sup>, Umaiz Butt<sup>2</sup>, and Ruya R. Ozer<sup>1\*</sup>

Department of Chemistry and Biochemistry<sup>1</sup>, Department of Chemical Engineering<sup>2</sup>, The University of Tulsa, Tulsa, OK, 74104, U.S.A.

\*Corresponding Author: [ruya-ozero@utulsa.edu](mailto:ruya-ozero@utulsa.edu)

#### Table of Contents

|                                                                                                                |           |
|----------------------------------------------------------------------------------------------------------------|-----------|
| Size distribution of the ZnO nanocrystals in the seed solution                                                 | <b>S1</b> |
| Image of the electrospun nanofibers after heat treatment                                                       | <b>S2</b> |
| Images of the glass slides containing electrospun nanofibers in ZnO seed solution                              | <b>S3</b> |
| Image of the glass slides in growth solution                                                                   | <b>S4</b> |
| High resolution SEM images showing the underlying nanofiber formation                                          | <b>S5</b> |
| Photocatalytic degradation of methylene blue in 30 min in the presence of the composite material               | <b>S6</b> |
| Calibration curve showing the linear relationship between the absorption at 654 nm and the concentration of MB | <b>S7</b> |
| MB concentration change as a function of time with and without the nanofibers under UV irradiation             | <b>S8</b> |
| Experimental Details                                                                                           | <b>S9</b> |

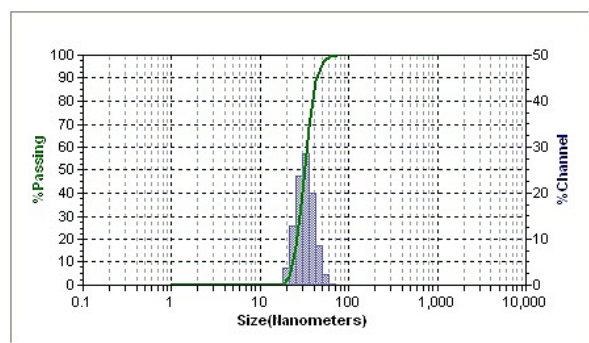

**S1.**Size distribution of the ZnO nanocrystals in the seed solution

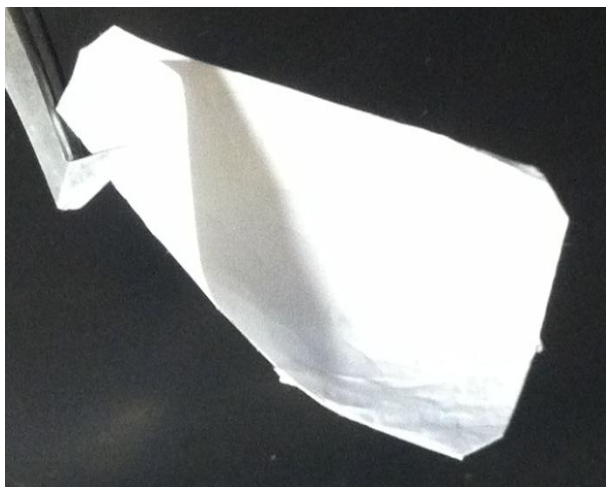

**S2.** Image of the electrospun nanofibers after heat treatment

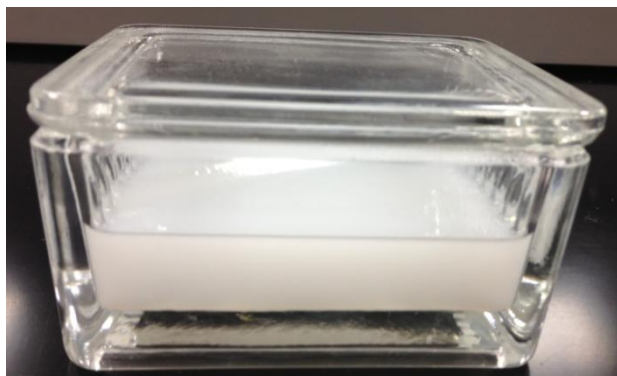

**S3.** Images of the glass slides containing electrospun nanofibers in ZnO seed solution

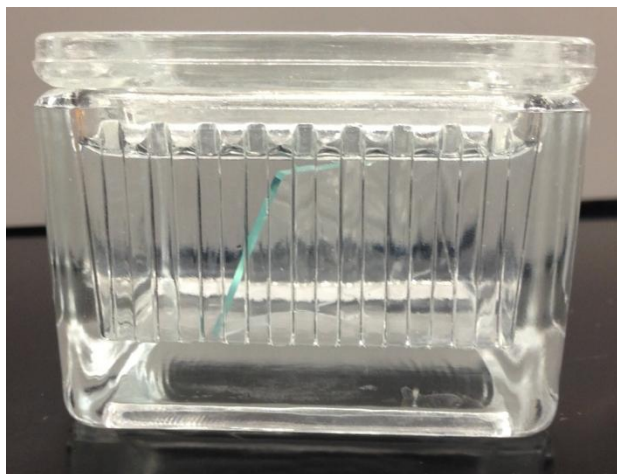

**S4.** Image of the glass slides in growth solution

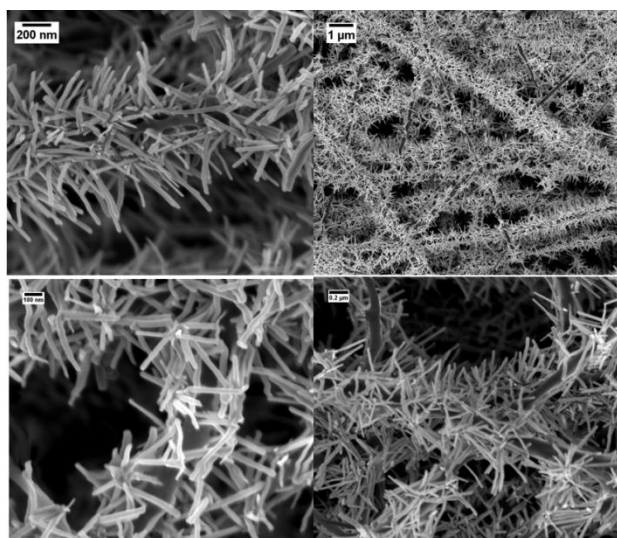

**S5.** High resolution SEM images showing the underlying nanofiber formation

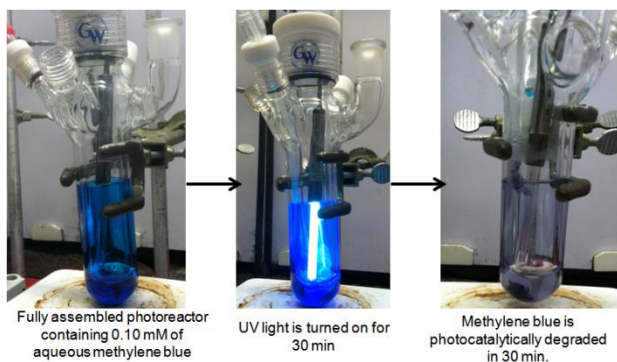

**S6.** Photocatalytic degradation of methylene blue in 30 min in the presence of the composite material

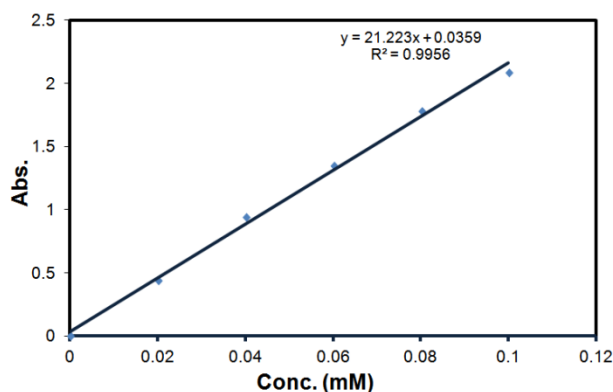

**S7.** Calibration curve showing the linear relationship between the absorption at 664 nm and the concentration of MB

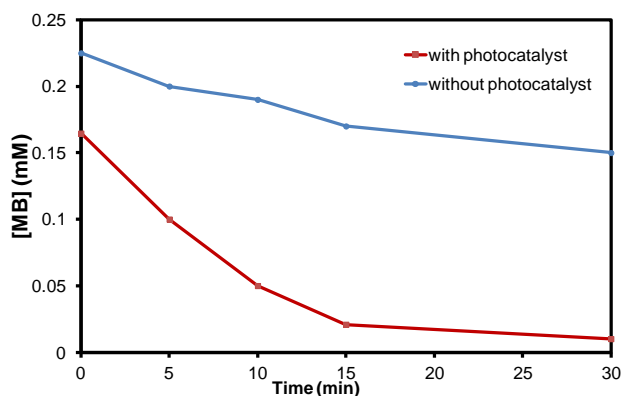

**S8.** MB concentration change as a function of time with and without the nanofibers under UV irradiation

## S9. Experimental Details

**Materials.** Cellulose acetate (CeAc,  $M_w \sim 50,000$ ), polyvinyl acetate (PVAc,  $M_w \sim 500,000$ ), polyethylene glycol (PEG,  $M_w \sim 300$ ), N,N-dimethylformamide (DMF, anhydrous, 99.8%), 2,2'-azobis(2-methylpropionitrile) (AIBN, 98%), zinc acetate dihydrate (ACS reagent,  $\geq 98\%$ ), triethylamine ( $\geq 99.5\%$ ), zinc nitrate hexahydrate (reagent grade 98%), hexamethylenetetramine ( $C_6H_{12}N_4$ , ACS reagent,  $\geq 99.0\%$ ), methylene blue (dye content,  $\geq 8\%$ ), isopropyl alcohol ( $C_3H_8O$ , anhydrous, 99.5%), and ethanol (99%) were purchased from Sigma-Aldrich. Premium microscope glass slides were procured from Fisher Scientific.

**Characterization.** Morphology of the materials was investigated using a JEOL JSM 6060 LV field emission scanning electron microscope (FESEM). The samples were coated with 5-10 nm Au layer before the SEM imaging. Crystal structures were analyzed using a Shimadzu XRD-6100 X-ray Diffractometer with Cu  $K\alpha$  radiation, employing a scanning rate of  $0.02^\circ \text{ s}^{-1}$  within the range of  $2\theta = 4^\circ - 64^\circ$ , operating at 40 kV and 33 mA (1320 Watt). Thermogravimetric analysis (TGA) were carried out using a Mettler Toledo 851 with a TSO 801RO robotic arm. The samples were heated from  $40^\circ \text{C}$  to  $600^\circ \text{C}$  at a rate of  $10^\circ \text{C/min}$  under a nitrogen atmosphere at a flow rate of 40 mL/min. UV-Vis transmittance of the samples was studied using a Varian Cary 50 UV-Vis Spectrophotometer in the wavelength range of 280-480 nm and a scan rate of 300 nm/min. Photoluminescence (PL) studies were performed at room temperature using a dual-scanning micro-plate Jasco FP-6500 spectrofluorometer (version 1.08.02) with the Spectra Manager Software using the excitation wavelength at 325 nm. All characterizations and measurements were carried out with the electrospun nanofibers immobilized on glass microscope slides. Image J Program was used to calculate the diameters and length of the fibers and nanowires which were averaged over 20 measurements.
